# Supplementary material for: Accumulation of TCR signaling from self-antigens in naive CD8 T cells mitigates early responsiveness
Source: PubMed Central journal article supplement — bioRxiv. 2023 Jan 28:2023.01.27.525946. Preprint. [Version 1] doi: 10.1101/2023.01.27.525946 (PMC9900884; doi:10.1101/2023.01.27.525946), 2023-01-28

Figure S1

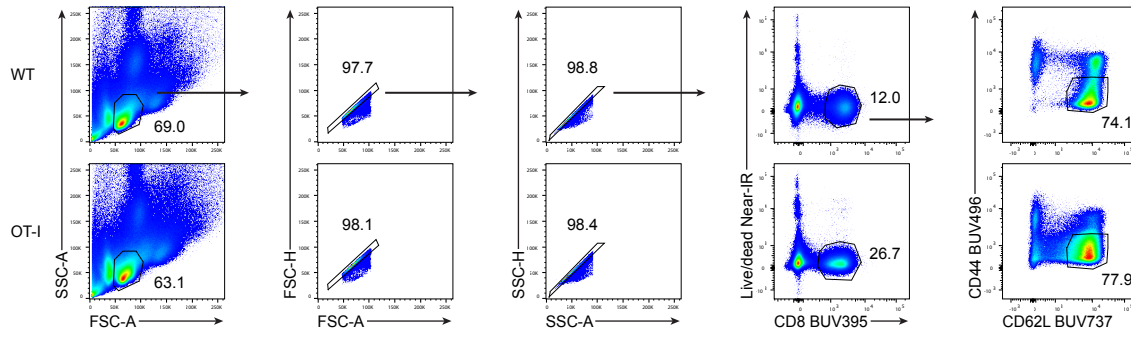

# Figure S2

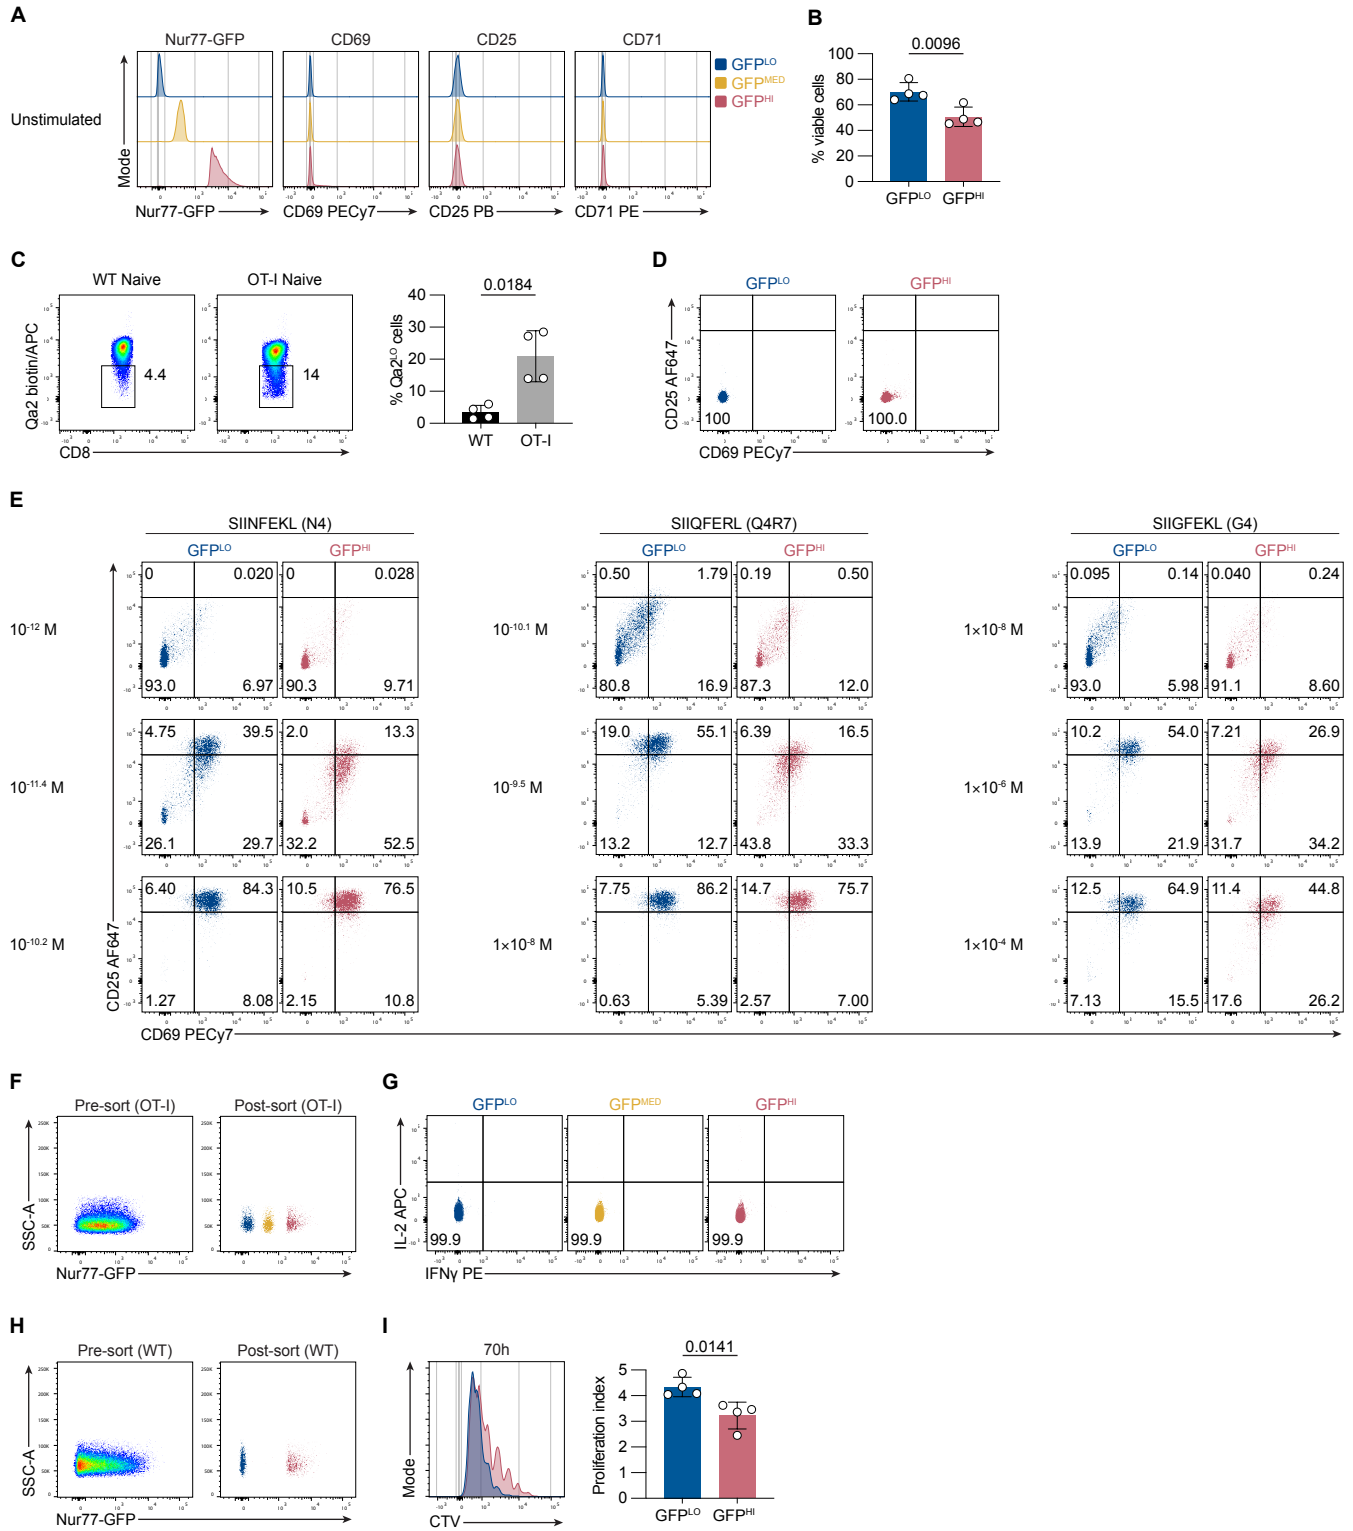

Figure S3

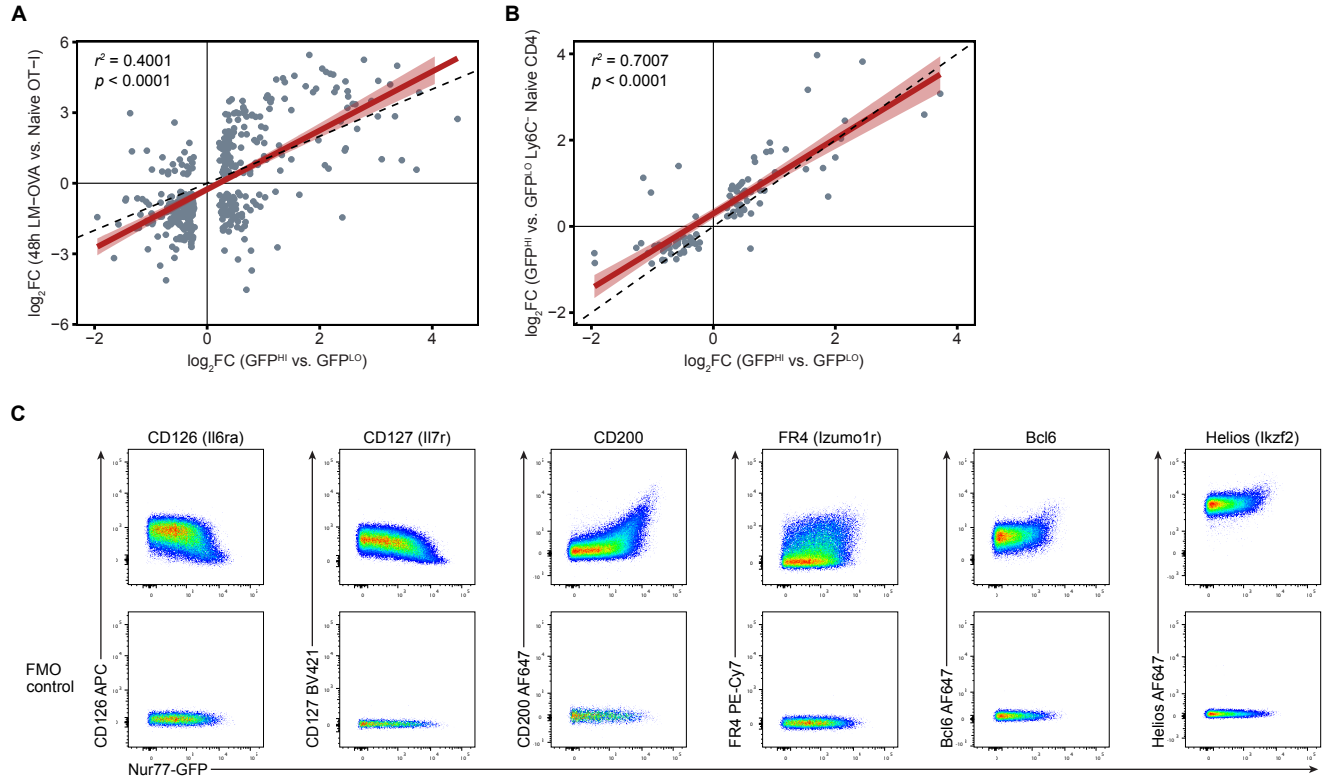

Figure S4

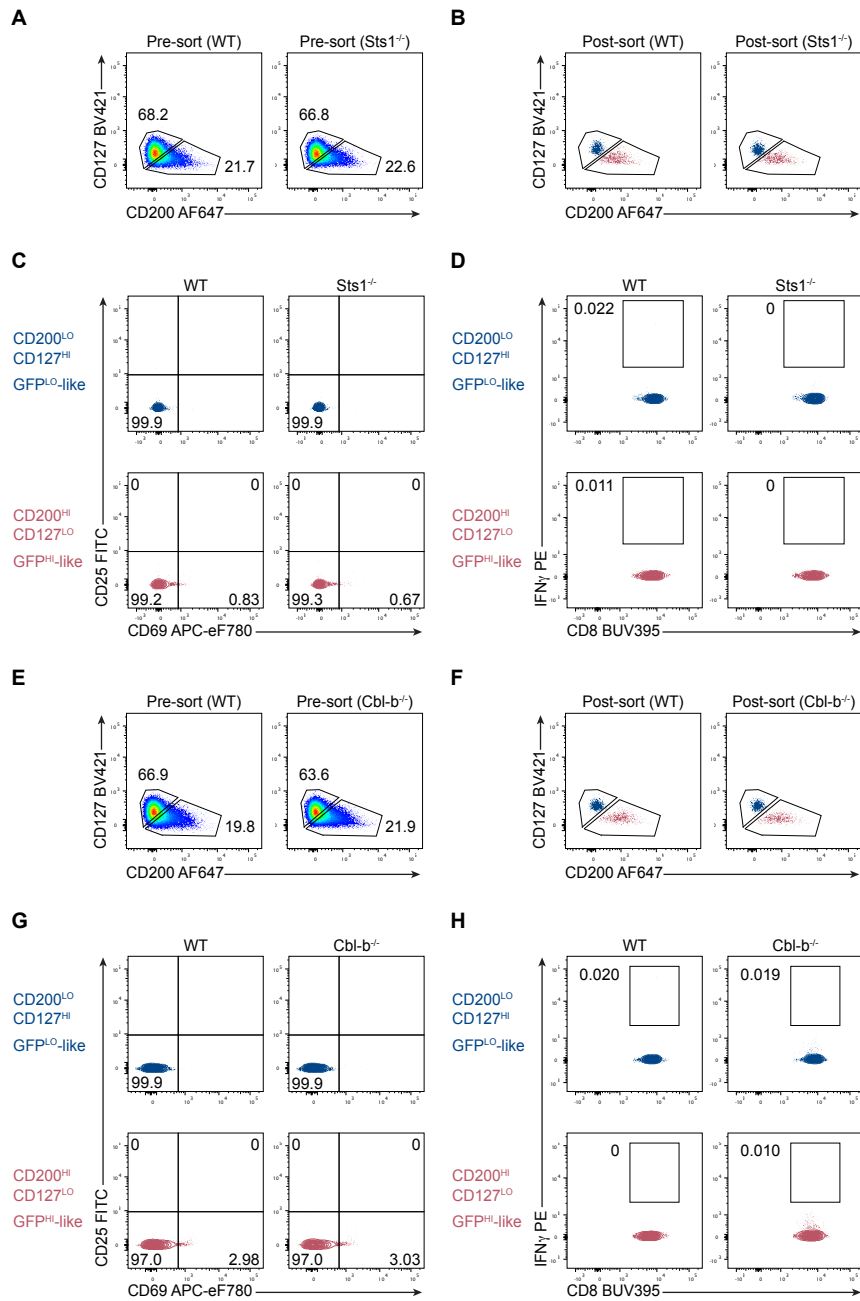

Supplement: media-1.pdf [file media-1.pdf]
